# Supplementary material
Source: publisher figshare collection journal article supplement (https://diabetesjournals.figshare.com/articles/dataset/_/21583392)
Supplement: Supplementary file 1 [file 1]

## Supplemental Table

***Table S1: ELISA Kits & Dilution Information for Tears & Plasma Neuromediators***

|                                                          | <b>Tears</b>                                      | <b>Plasma</b>                                             |
|----------------------------------------------------------|---------------------------------------------------|-----------------------------------------------------------|
| <b>Substance P (SP)</b>                                  | 6x dilution; R&D Systems, Minneapolis, USA        | 5x dilution; LifeSpan BioSciences, Inc., Seattle, WA, USA |
| <b>Calcitonin Gene Related Peptide (CGRP)</b>            | 3x dilution; Phoenix Pharmaceuticals, Runcorn, UK | 1.5x dilution; MyBioSource Inc., Vancouver, Canada        |
| <b>Neuropeptide Y (NPY)</b>                              | 3x dilution; Phoenix Pharmaceuticals, Runcorn, UK | 1.5x dilution; RayBiotech Life Inc., GA, USA              |
| <b>Beta-Nerve Growth Factor (<math>\beta</math>-NGF)</b> | 2.5x dilution; RayBiotech Life, Inc., GA, USA     | Not applicable                                            |
