# Supplementary material
Source: publisher figshare collection journal article supplement (https://diabetesjournals.figshare.com/articles/dataset/_/21583392)
Supplement: Supplementary file 2 [file 1]

**Supplemental Figure**

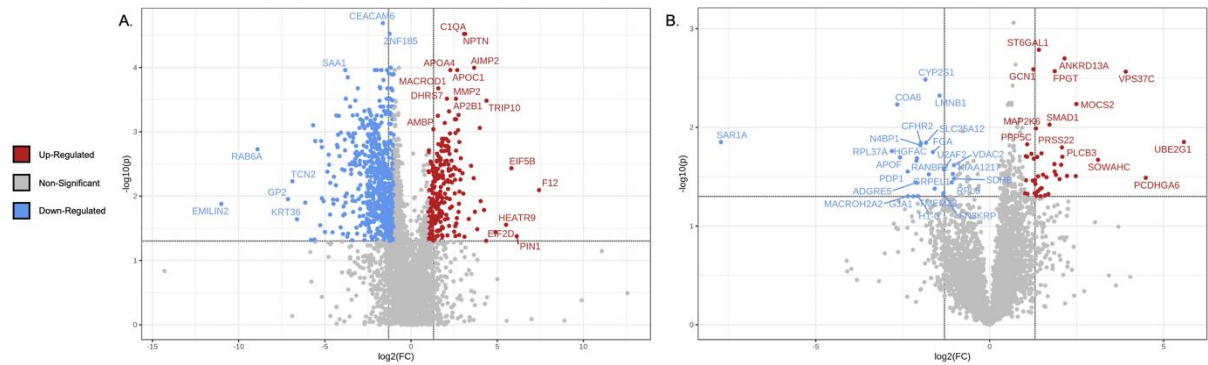

**Figure S1:** Volcano plots presenting the fold changes (FC) of the tear proteins comparing (A) study patients versus healthy controls (FC >2 or <0.5, adjusted  $p < 0.05$ ), and (B) study patients before and after treatment (FC >2 or <0.5, adjusted  $p < 0.05$ ).

Red dots indicate significantly up-regulated proteins ( $\log_2 \text{FC} > 1.5$  and  $P < 0.05$ , i.e.  $\log_2 \text{FC} > 0.58$  and  $-\log_2 P > 4.3$ ) and blue dots indicate significantly down-regulated proteins ( $\log_2 \text{FC} < -0.67$  and  $P < 0.05$ , i.e.  $\log_2 \text{FC} < -0.58$  and  $-\log_2 P > 4.3$ ).
